# Supplementary material
Source: publisher figshare collection journal article supplement (https://acs.figshare.com/ndownloader/files/5091136)
Supplement: Supplementary file 1 [file 5091136]

Supporting Information for

# Regulation of Saccharide Binding with Basic Poly(ethynylpyridine)s by H<sup>+</sup>-Induced Helix Formation

Hajime Abe,\* Nozomi Masuda, Minoru Waki, and Masahiko Inouye\*

*Faculty of Pharmaceutical Sciences, Toyama Medical and Pharmaceutical University, Toyama 930-0194, Japan, and PRESTO, Japan Science and Technology Agency (JST)*

## Contents

|                                                                                                      |     |
|------------------------------------------------------------------------------------------------------|-----|
| Experimental Section                                                                                 | S2  |
| Figure S1–S8                                                                                         | S6  |
| <sup>1</sup> H NMR spectrum for polymer <b>2</b> and the additive effect of TFA                      | S13 |
| <sup>1</sup> H NMR spectra for compounds <b>5</b> , <b>7</b> , <b>8</b> , <b>9</b> , and <b>11</b>   | S14 |
| Computationally optimized Cartesian coordinates of <b>12</b> , <b>13</b> , and their conjugate acids | S19 |

## Experimental Section

**General.** NMR spectra were recorded on a Varian Gemini 300 spectrometer using tetramethylsilane (TMS) as an internal reference. UV-vis, fluorescence, CD, and IR spectra were measured on JASCO V-560, FP-6500, J-720WI, and FTIR-460plus spectrometers, respectively. ESI-HRMS analyses were carried out on a JEOL JMS-T100LC mass spectrometer. THF was freshly distilled from sodium benzophenone ketyl before use, and other solvents were purified with standard methods.

**2,6-Dibromo-4-(*N*-methyl-*N*-octylamino)pyridine (5).** A NaH (0.97 g, 24 mmol; commercial 60% dispersion was washed thoroughly with hexane before use) suspension in DMF (15 mL) was cooled with an ice bath, and then to the suspension was added slowly *N*-methyloctylamine (3.2 g, 22 mmol). After that, to the mixture was added 2,6-dibromo-4-nitropyridine<sup>1</sup> (6.2 g, 22 mmol) in one portion at 0 °C. The reaction mixture was then stirred for 2 h, being allowed to reach the room temperature. The resulting mixture was cautiously quenched by the addition of water and extracted with AcOEt. The AcOEt extract was washed with brine, dried over Na<sub>2</sub>SO<sub>4</sub>, and evaporated. The evaporated residue was purified by silica gel column chromatography (AcOEt/hexane, 1:1) to afford **5** (4.3 g, 52%) as orange oil. IR (neat) 2922, 2850, 1581 cm<sup>-1</sup>; <sup>1</sup>H NMR (CDCl<sub>3</sub>, 300 MHz)  $\delta$  0.87–0.93 (m, 3 H), 1.25–1.35 (m, 12 H), 2.94 (s, 3 H), 3.27 (t, *J* = 7.5 Hz, 2 H), 6.58 (s, 2 H); <sup>13</sup>C NMR (CDCl<sub>3</sub>, 75 MHz)  $\delta$  14.2, 22.7, 26.7, 26.9, 29.3, 29.4, 31.8, 38.1, 52.1, 108.7, 140.8, 155.8; ESI-HRMS *m/z* calcd for C<sub>14</sub>H<sub>23</sub>Br<sub>2</sub>N<sub>2</sub> (M + H<sup>+</sup>): 377.0228; found: 377.0239.

**4-(*N*-Methyl-*N*-octylamino)-2,6-bis(trimethylsilylethynyl)pyridine (6).** To an *i*-Pr<sub>2</sub>NH (40 mL) suspension of PdCl<sub>2</sub>(PPh<sub>3</sub>)<sub>2</sub> (480 mg, 0.69 mmol) and CuI (130 mg, 0.69 mmol) were added **5** (5.2 g, 14 mmol) and (trimethylsilyl)acetylene (4.2 g, 29 mmol) subsequently. The mixture was stirred for 3.5 h at room temperature and concentrated, and the resulting residue was extracted with AcOEt. The AcOEt extract was filtered to remove the insoluble material and washed with 5% aqueous ethylenediamine and brine subsequently. The AcOEt layer was dried over Na<sub>2</sub>SO<sub>4</sub> and evaporated. The resulting crude oil including **6** was brought to the next deprotection step without further purification.

**2,6-Diethynyl-4-(*N*-methyl-*N*-octylamino)pyridine (7).** To a THF (40 mL) solution of **6** (14 mmol) prepared above were added *n*-Bu<sub>4</sub>NF (1.0 M THF solution, 25 mL, 25 mmol) and a few drops of H<sub>2</sub>O subsequently. The mixture was stirred for 0.5 h at room temperature, concentrated, and diluted with CH<sub>2</sub>Cl<sub>2</sub>/H<sub>2</sub>O. The separated CH<sub>2</sub>Cl<sub>2</sub> layer was washed with brine, dried over Na<sub>2</sub>SO<sub>4</sub>, and evaporated. The resulting residue was purified by silica gel column chromatography (CH<sub>2</sub>Cl<sub>2</sub>/hexane, 1:1) to afford **7** (3.0 g, 81% yield from **5**) as orange oil. IR (KBr) 3292, 2925, 2854, 2097, 1593 cm<sup>-1</sup>; <sup>1</sup>H NMR (CDCl<sub>3</sub>, 300 MHz)  $\delta$  0.86–0.92 (m, 3 H), 1.23–1.35 (m, 12 H), 2.96 (s, 3 H), 3.01 (s, 2 H), 3.30 (t, *J* = 7.5 Hz, 2 H), 6.66 (s, 2 H); <sup>13</sup>C NMR (CDCl<sub>3</sub>, 75 MHz)  $\delta$  14.2, 22.7, 26.8, 27.0, 29.3, 29.4, 31.8, 37.8, 51.7, 75.5, 83.3, 109.9, 142.3, 153.3; ESI-HRMS *m/z* calcd for C<sub>18</sub>H<sub>25</sub>N<sub>2</sub> (M + H<sup>+</sup>): 269.2018; found: 269.2006.

**2,6-Diiodo-4-(*N*-methyl-*N*-octylamino)pyridine (8).** This compound was prepared by the Cu-mediated halogen-exchange procedure reported by us.<sup>2</sup> A mixture of **5** (4.6 g, 12 mmol), CuI (53 g, 280 mmol), and KI (110 g, 660 mg) in DMF (450 mL) was stirred for 14 h at 140 °C. The resulting brown mixture was diluted with AcOEt/aqueous Na<sub>2</sub>S<sub>2</sub>O<sub>3</sub> and filtered to remove insoluble material. The AcOEt layer was washed with 5% aqueous ethylenediamine and brine subsequently, dried over Na<sub>2</sub>SO<sub>4</sub>, and evaporated. The resulting residue was purified by silica gel column chromatography (CH<sub>2</sub>Cl<sub>2</sub>) to afford **8** (5.0 g, 87%) as orange oil. IR (KBr) 2925, 2853, 1570 cm<sup>-1</sup>; <sup>1</sup>H NMR (CDCl<sub>3</sub>, 300 MHz)  $\delta$  0.86–0.94 (m, 3 H), 1.22–1.35 (m, 12 H), 2.94 (s, 3 H), 3.23 (t, *J* = 7.5 Hz, 2 H), 6.84 (s, 2 H); <sup>13</sup>C NMR (CDCl<sub>3</sub>, 75 MHz)  $\delta$  14.1, 22.7, 26.7, 26.9, 29.3, 29.4, 31.8, 37.9, 51.8, 116.0, 116.3, 154.1; ESI-HRMS *m/z* calcd for C<sub>14</sub>H<sub>23</sub>I<sub>2</sub>N<sub>2</sub> (M + H<sup>+</sup>): 472.9951; found: 472.9964.

**2,6-Bis{[6-iodo-4-(*N*-methyl-*N*-octylamino)-2-pyridyl]ethynyl}-4-(*N*-methyl-*N*-octylamino)pyridine (9).** To an *i*-Pr<sub>2</sub>NH (30 mL)/THF (50 mL) suspension of Pd(PPh<sub>3</sub>)<sub>4</sub> (310 mg, 260  $\mu$ mol) and CuI (50 mg, 260  $\mu$ mol) were added **7** (1.4 g, 5.3 mmol) and an excess of **8** (16 g, 34 mmol). The mixture was stirred for 12 h at room temperature, concentrated, and the resulting residue was diluted with AcOEt. The AcOEt suspension was filtered to remove insoluble material and diluted with further AcOEt. The AcOEt layer was washed with 5% aqueous ethylenediamine and brine subsequently, dried over Na<sub>2</sub>SO<sub>4</sub>, and evaporated. The evaporated residue was purified by silica gel column chromatography (CH<sub>2</sub>Cl<sub>2</sub>/hexane, 1:1) to afford **9** (4.0 g, 79% yield based on **7**) as yellow oil. IR (KBr) 2924, 2853, 1582 cm<sup>-1</sup>; <sup>1</sup>H NMR (CDCl<sub>3</sub>, 300 Hz)  $\delta$  0.86–0.93 (m, 9 H), 1.22–1.37 (m, 36 H), 2.93 (s, 6 H), 2.97 (s, 3 H), 3.23–3.35 (m, 6 H), 6.82–6.86 (m, 6 H); <sup>13</sup>C NMR (CDCl<sub>3</sub>, 75 Hz)  $\delta$  14.2, 22.7, 26.8, 26.9, 27.0, 27.1, 29.3, 29.4, 29.5, 31.8, 37.9, 51.9, 86.3, 88.1, 110.5, 110.9, 116.0, 118.4, 142.4, 142.6, 153.2, 153.5; ESI-HRMS *m/z* calcd for C<sub>46</sub>H<sub>67</sub>I<sub>2</sub>N<sub>6</sub> (M + H<sup>+</sup>): 957.3517; found: 957.3480.

**2-{[6-Iodo-4-(*N*-methyl-*N*-octylamino)-2-pyridyl]ethynyl}-4-(*N*-methyl-*N*-octylamino)-6-{[4-(*N*-methyl-*N*-octylamino)-6-(trimethylsilylethynyl)-2-pyridyl]ethynyl}pyridine (10).** To an *i*-Pr<sub>2</sub>NH (20 mL)/THF (20 mL) suspension of Pd<sub>2</sub>(dba)<sub>2</sub>·CHCl<sub>3</sub> (150 mg, 0.12 mmol), CuI (23 mg, 0.12 mmol), and trimesitylphosphine (140 mg, 0.35 mmol) were added **9** (2.4 g, 2.5 mmol) and (trimethylsilyl)acetylene (79 mg, 0.80 mmol) subsequently. The mixture was stirred for 13 h at room temperature and concentrated, and to the residue was added AcOEt. The AcOEt suspension was filtered to remove insoluble material, washed with aqueous 5% ethylenediamine and brine subsequently, dried over Na<sub>2</sub>SO<sub>4</sub>, and evaporated. The resulting crude oil including **10** was brought to the next deprotection step without further purification.

**2-{[6-Ethynyl-4-(*N*-methyl-*N*-octylamino)-2-pyridyl]ethynyl}-6-{[6-iodo-4-(*N*-methyl-*N*-octylamino)-2-pyridyl]ethynyl}-4-(*N*-methyl-*N*-octylamino)pyridine (11).** To a THF (30 mL) solution of **10** prepared as above were added *n*-Bu<sub>4</sub>NF (1.0 M THF solution, 0.80 mL, 0.80 mmol) and a few drops of H<sub>2</sub>O subsequently. The reaction mixture was stirred for 1 h at room temperature, concentrated, and diluted with CH<sub>2</sub>Cl<sub>2</sub>/H<sub>2</sub>O. The separated CH<sub>2</sub>Cl<sub>2</sub> layer was washed with brine, dried over Na<sub>2</sub>SO<sub>4</sub>, and evaporated. The resulting residue was purified by silica gel column chromatography (CH<sub>2</sub>Cl<sub>2</sub>/AcOEt/hexane, 1:1:3) to afford **11** (450 mg, 66% based on (trimethylsilyl)acetylene used in the

previous step) as orange oil. IR (KBr) 3305, 2925, 2853, 2102  $\text{cm}^{-1}$ ;  $^1\text{H}$  NMR ( $\text{CDCl}_3$ , 300 MHz)  $\delta$  0.84–0.93 (m, 9 H), 1.22–1.37 (m, 36 H), 2.93 (s, 3 H), 2.96 (s, 6 H), 3.02 (s, 1 H), 3.24–3.35 (m, 6 H), 6.63–6.66 (m, 1 H), 6.81–6.88 (m, 5 H);  $^{13}\text{C}$  NMR ( $\text{CDCl}_3$ , 75 MHz)  $\delta$  14.1, 22.7, 26.7, 26.9, 29.3, 29.5, 31.8, 37.8, 37.9, 51.8, 75.4, 83.3, 86.1, 87.0, 87.1, 88.1, 109.6, 110.4, 110.8, 115.9, 118.4, 142.2, 142.3, 142.5, 142.69, 142.74, 153.2, 153.4; ESI-HRMS  $m/z$  calcd for  $\text{C}_{18}\text{H}_{25}\text{N}_2$  ( $\text{M} + \text{H}^+$ ): 855.4550; found: 855.4590.

**Basic Ethynylpyridine Polymer 2.** To an *i*-Pr<sub>2</sub>NH (80 mL)/DMF (80 mL) suspension of  $\text{PdCl}_2(\text{PPh}_3)_2$  (6.6 mg, 9.4  $\mu\text{mol}$ ) and CuI (1.8 mg, 9.4  $\mu\text{mol}$ ) was added **11** (800 mg, 940  $\mu\text{mol}$ ). The mixture was stirred for 15 h at room temperature. To the reaction mixture was added 3-aminopropyl-functionalized silica gel (1.0 mmol/g, 500 mg) to scavenge the copper salt, and the resulting suspension was filtered. The filtrate was stirred for an additional 1 h at room temperature and concentrated. The concentrated residue was diluted with AcOEt/hexane (1:1, 300 mL), and the solution was centrifuged (2300 rpm; 4 °C; 5 min). The supernatant liquid phase was decanted off. This centrifugal washing manipulation was repeated four times. The obtained precipitate was dried under reduced pressure to yield **2** (380 mg, 48% w/w yield) as brown powder. IR (KBr) 2924, 2852, 1587  $\text{cm}^{-1}$ ;  $^1\text{H}$  NMR ( $\text{CDCl}_3$ , 300 MHz)  $\delta$  0.82–0.94 (m, 3n H), 1.20–1.38 (m, 12n H), 2.90–3.04 (m, 3n H), 3.22–3.38 (m, 2n H), 7.82–7.92 (m, 2n H);  $^{13}\text{C}$  NMR ( $\text{CDCl}_3$ , 75 MHz)  $\delta$  14.2, 22.7, 26.8, 26.9, 27.1, 29.4, 29.4, 29.5, 31.9, 37.9, 52.0, 87.2, 110.4, 142.8, 153.2.

**Vapor Pressure Osmometry (VPO) Analyses for 2.** VPO analyses for **2** were performed on a Gonotec OSMOMAT 070 osmometer and benzil was used as a standard. A  $\text{CHCl}_3$  solutions of six different concentrations of **2** ( $2.0 \times 10^{-3}$ ,  $4.0 \times 10^{-3}$ ,  $6.0 \times 10^{-3}$ ,  $8.0 \times 10^{-3}$ ,  $1.0 \times 10^{-2}$ ,  $1.2 \times 10^{-2}$  mmol/kg, unit concentration) were measured at 40 °C.  $M_n$  value of  $1.1 \times 10^4$  g/mol was given by these analyses.

**Evaluation of Binding Strengths of 2 with Glycosides Using Curve-Fitting Method on CD analyses.** Polymer **2** (1.0 mM, unit concentration) and TFA (0 or 0.5 mM) were dissolved in  $\text{CH}_2\text{Cl}_2$  (commercial anhydrous reagent was treated with dry  $\text{K}_2\text{CO}_3$  before use). This solution was titrated with a solution or solid of guest glycoside, and the observed ellipticity on CD was plotted versus the concentration of the glycoside. The formal binding constants were obtained by iterative curve-fitting measurements based on the following assumptions and equation.<sup>3</sup>

Assumption 1:

The concentration [**2**] was assumed as  $2.2 \times 10^{-5}$  M based on the  $M_n$  value ( $1.1 \times 10^4$  g  $\text{mol}^{-1}$ ) measured by VPO.

Assumption 2:

Glycosides and **2** form complexes predominantly in 1:1 manner as the case of oligomeric **1** ( $n = 24$ ).<sup>4</sup>

Equation:

$$\theta_{\text{obs}} = \frac{\theta_{11}}{2K_{11}[\mathbf{2}]_0} \left[ 1 + K_{11}[\mathbf{2}]_0 + K_{11}[\mathbf{G}]_0 - \left\{ (1 + K_{11}[\mathbf{2}]_0 + K_{11}[\mathbf{G}]_0)^2 - 4K_{11}^2[\mathbf{2}]_0[\mathbf{G}]_0 \right\}^{1/2} \right]$$

$K_{11}$ : the 1:1 binding constant of **2** with glycosides

$\theta_{\text{obs}}$ : the observed ellipticity

$\theta_{11}$ : ellipticity of the 1:1 host-guest complex (at the saturation point)

$[\mathbf{2}]_0$ : the total concentration of **2**

$[\mathbf{G}]_0$ : the total concentration of guest glycoside

**Computational Method.** Quantum chemical calculations were carried out with a Gaussian 03 program. The geometry optimization and the evaluation of zero point energy (ZPE) were performed by the use of DFT(B3LYP) method and 6-31G(d) basis sets, and the total energy was calculated by the use of DFT(B3LYP) method and 6-311+G(2d,p) basis sets.

## References

- (1) Neumann, U.; Vögtle, F. *Chem. Ber.* **1989**, *122*, 589–591.
- (2) Suzuki, H.; Kondo, A.; Inouye, M.; Ogawa, T. *Synthesis* **1986**, 121–122.
- (3) Connors, K. A. *Binding Constants*, John Wiley & Sons, New York, 1987.
- (4) Inouye, M.; Waki, M.; Abe, H. *J. Am. Chem. Soc.* **2004**, *126*, 2022–2027.

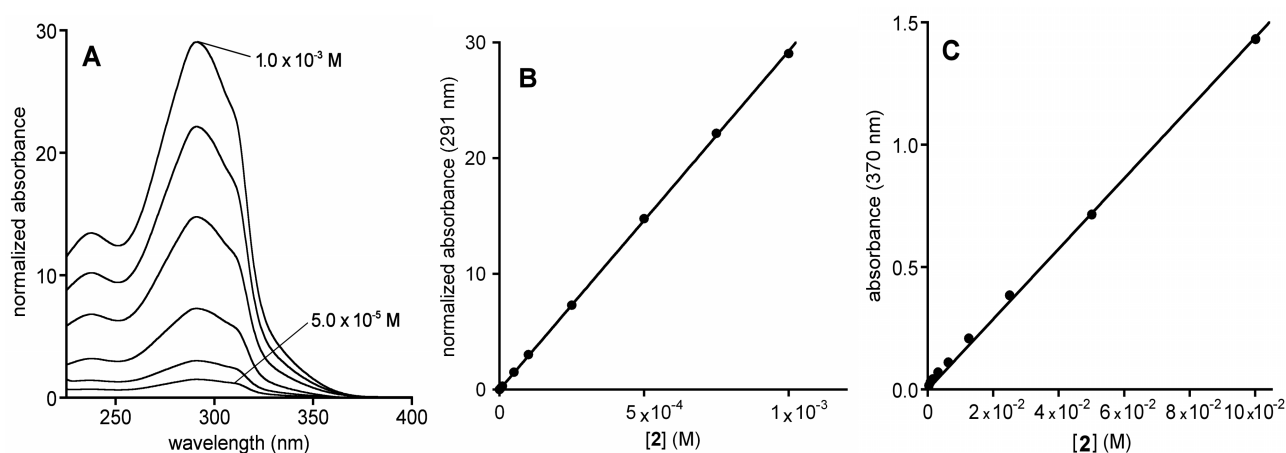

**Figure S1.** (A) UV-vis spectra of **2** at the concentrations varying from  $1.0 \times 10^{-3}$  to  $5.0 \times 10^{-5}$  M in  $\text{CH}_2\text{Cl}_2$  at 26 °C. Light path length was 1 or 10 mm, and the measured absorbance was normalized to that for 10 mm. (B) Beer's plot of the normalized absorbance at 291 nm versus the concentration of **2** for analyses shown in (A). (C) Beer's plot of the absorbance at 363 nm versus the concentration of **2** ( $1.0 \times 10^{-1}$  to  $3.9 \times 10^{-4}$  M) in  $\text{CHCl}_3$  at 40 °C (VPO conditions). Light path length = 1 mm.

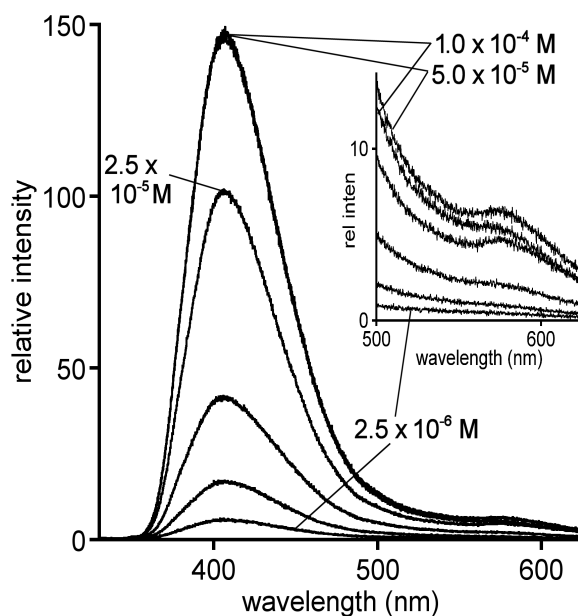

**Figure S2.** Fluorescence spectra of **2** at the concentration varying from  $1.0 \times 10^{-4}$  to  $2.5 \times 10^{-6}$  M (unit concentration) in  $\text{CH}_2\text{Cl}_2$  at 26 °C.  $\lambda_{\text{ex}} = 315$  nm, light path length = 10 mm.

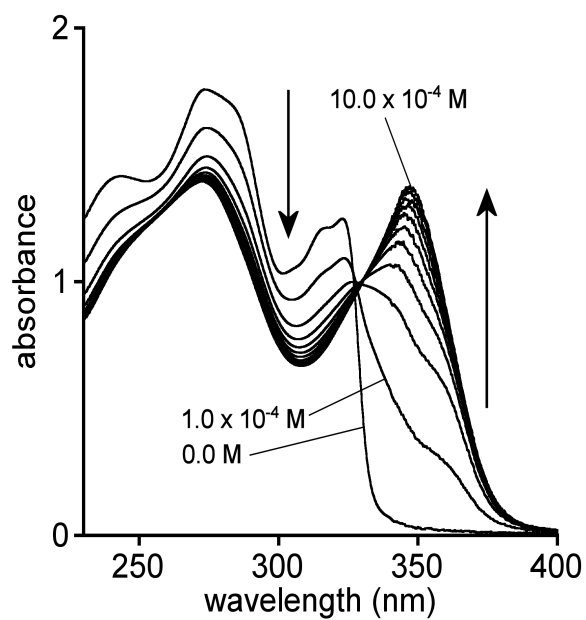

**Figure S3.** The change of the absorption spectrum of **1** on titration with TFA. Conditions: **1** ( $1.0 \times 10^{-4}$  M, unit concentration), TFA (0.0 to  $10.0 \times 10^{-4}$  M),  $\text{CH}_2\text{Cl}_2$ , 26 °C. Light path length = 10 mm.

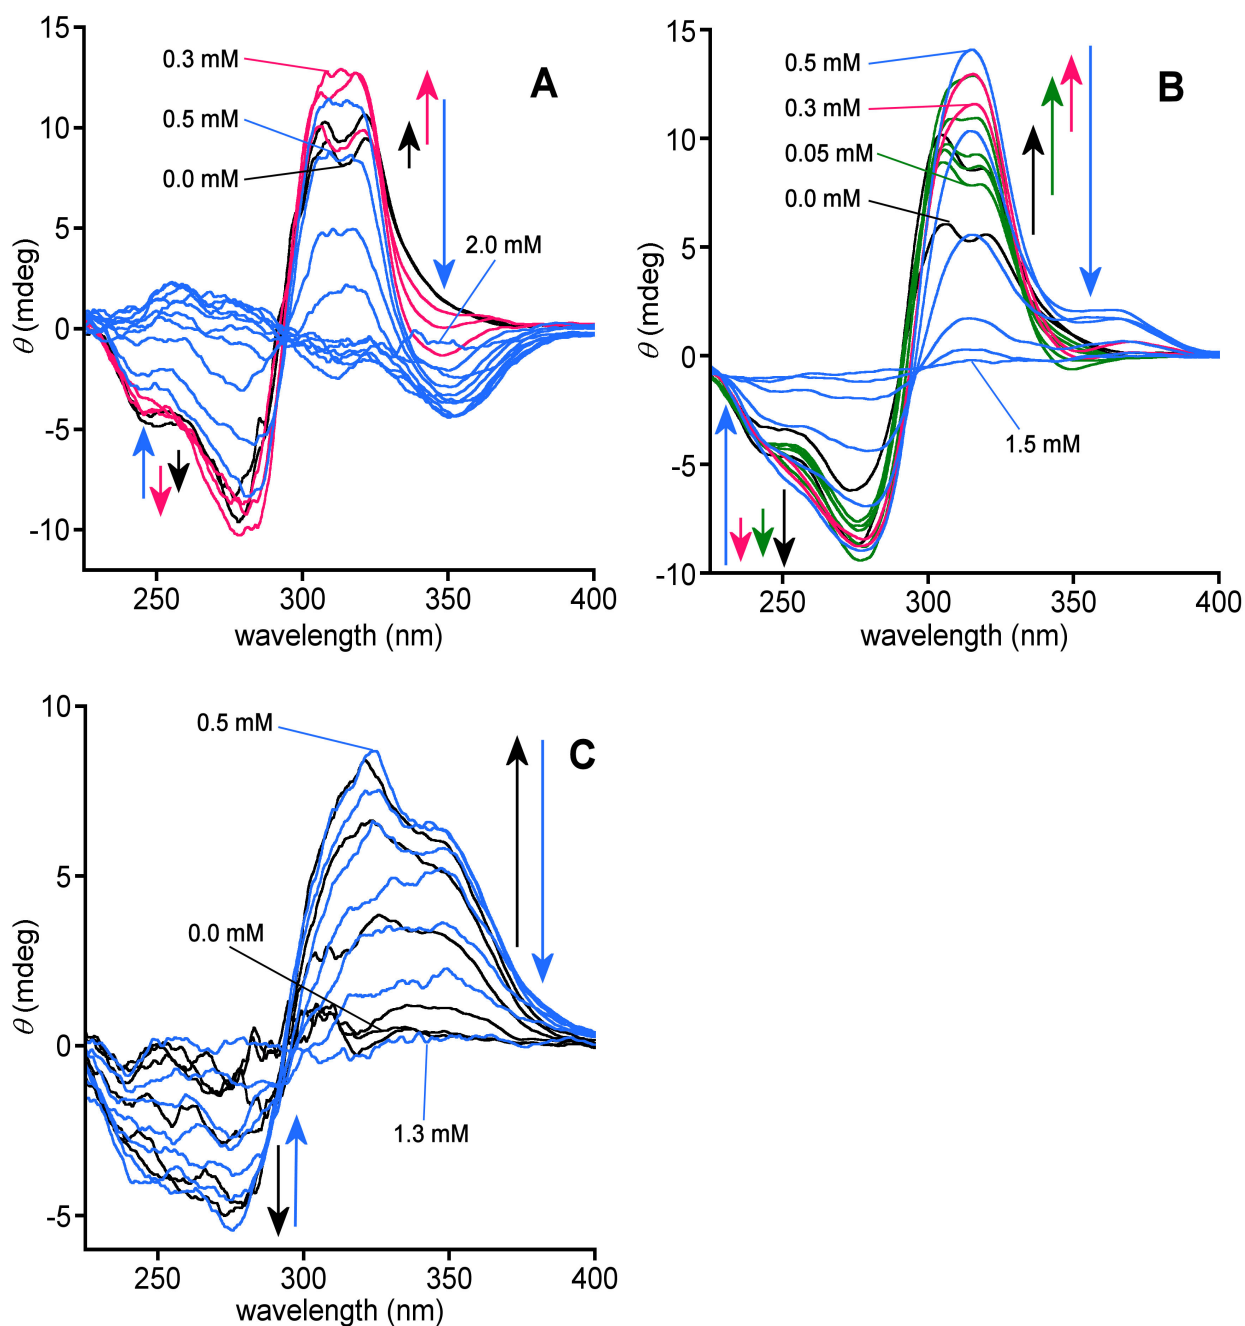

**Figure S4.** The change of CD spectrum of the complex between **2** and (A)  $\beta$ -D-Fru, (B)  $\beta$ -D-Man, or (C)  $\beta$ -D-Gal, on titration with TFA. Conditions: **2** (1.0 mM, unit concentration), hexose (2.5 mM), TFA ((A) 0 to 0.05 mM/black, 0.1 to 0.3 mM/red, 0.4 to 2.0 mM/blue. (B) 0 to 0.025 mM/black, 0.05 to 0.25 mM/green, 0.3 to 0.4 mM/red, 0.5 to 1.5 mM/blue. (C) 0 to 0.4 mM/black, 0.5 to 1.3 mM/blue),  $\text{CH}_2\text{Cl}_2$ , 26 °C. Light path length = 1 mm.



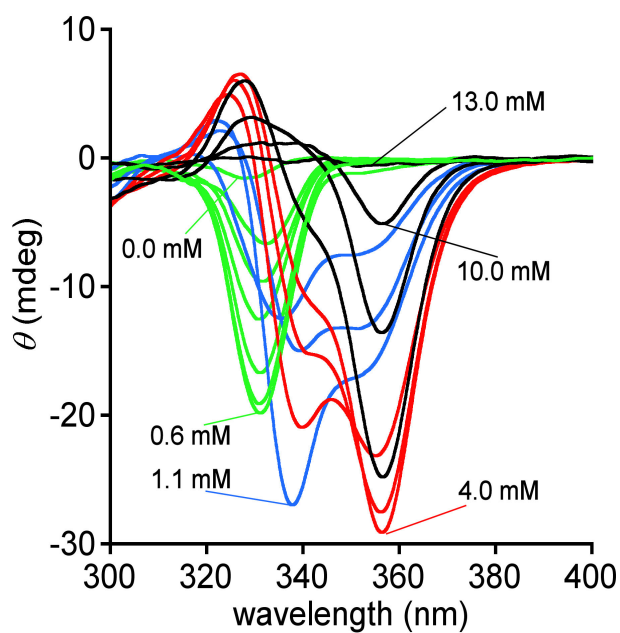

**Figure S5.** The change of CD spectrum of the complex between **1** and  $\beta$ -D-Glc on titration with TFA. Conditions: **1** (1.0 mM, unit concentration),  $\beta$ -D-Glc (2.5 mM), TFA (0.0–0.6 mM/green, 0.8–1.1 mM/blue, 2.0–4.0 mM/red, 6.0–13.0 mM/black), CH<sub>2</sub>Cl<sub>2</sub>, 26 °C. Light path length = 1 mm.

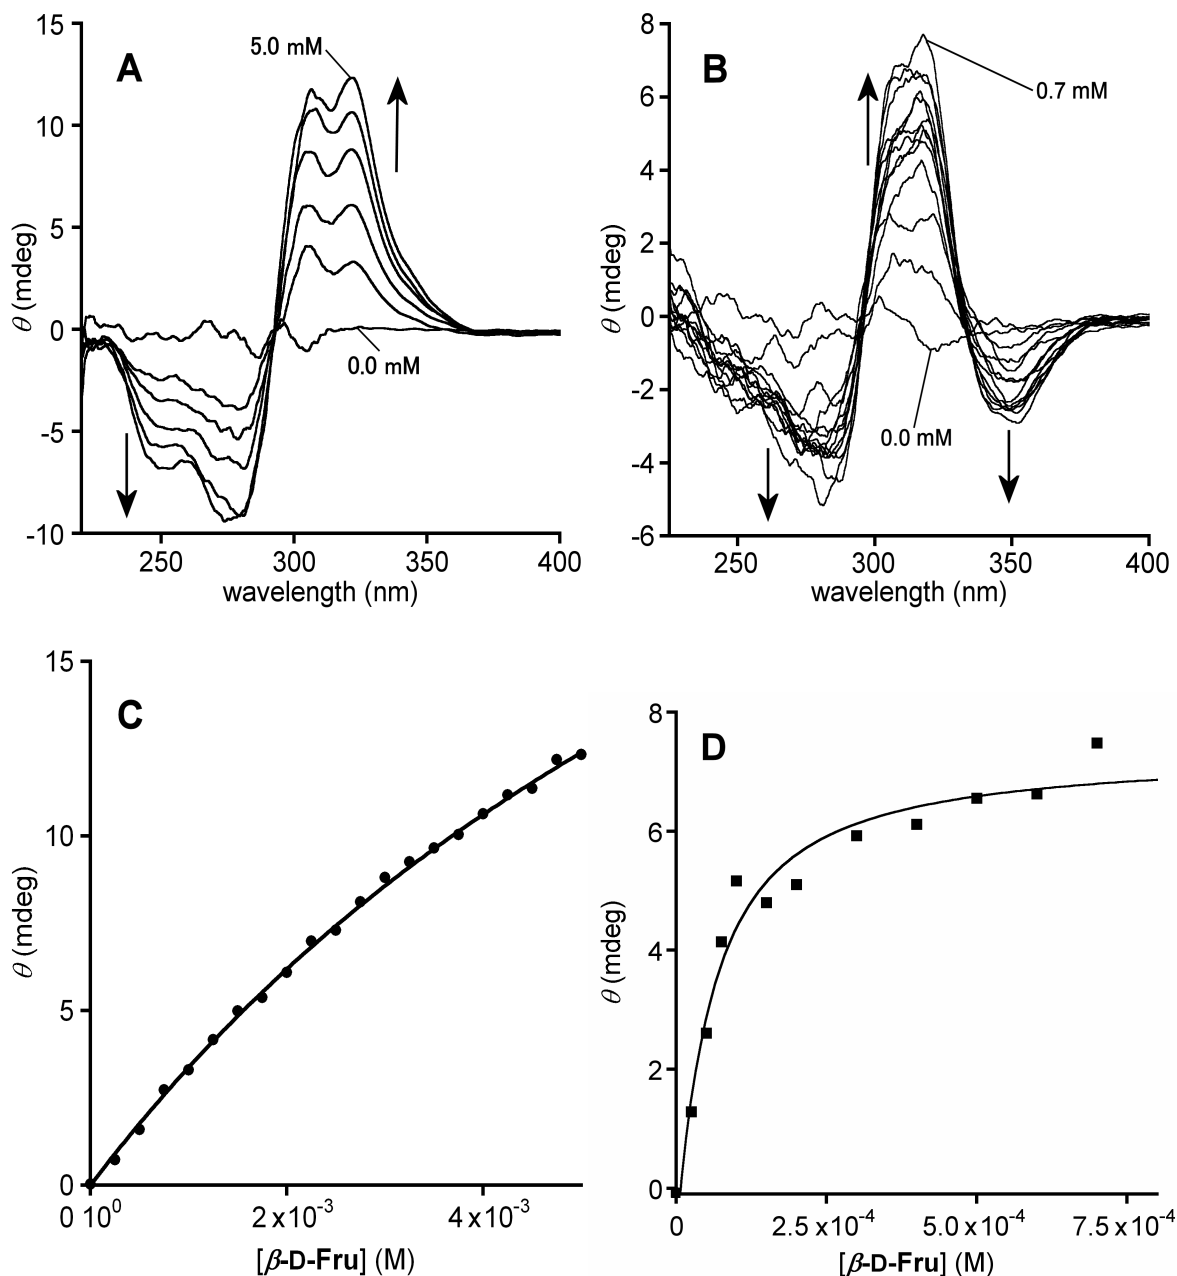

**Figure S6.** The change of the CD spectrum on the titration of **2** ( $1.0 \times 10^{-3}$  M, unit concentration) with  $\beta$ -D-Fru in  $\text{CH}_2\text{Cl}_2$  at 26 °C in the (A) absence or (B) presence of TFA ( $5.0 \times 10^{-4}$  M). Light path length = 1 mm. The titration curves in the absence (C, 322 nm was observed) or presence (D, 316 nm was observed) of TFA. The lines are theoretical curves obtained by the iterative curve-fitting analyses assuming 1:1 complexation between **2** and  $\beta$ -D-Fru and the molecular weight of **2** as  $1.1 \times 10^4$  g mol $^{-1}$ .

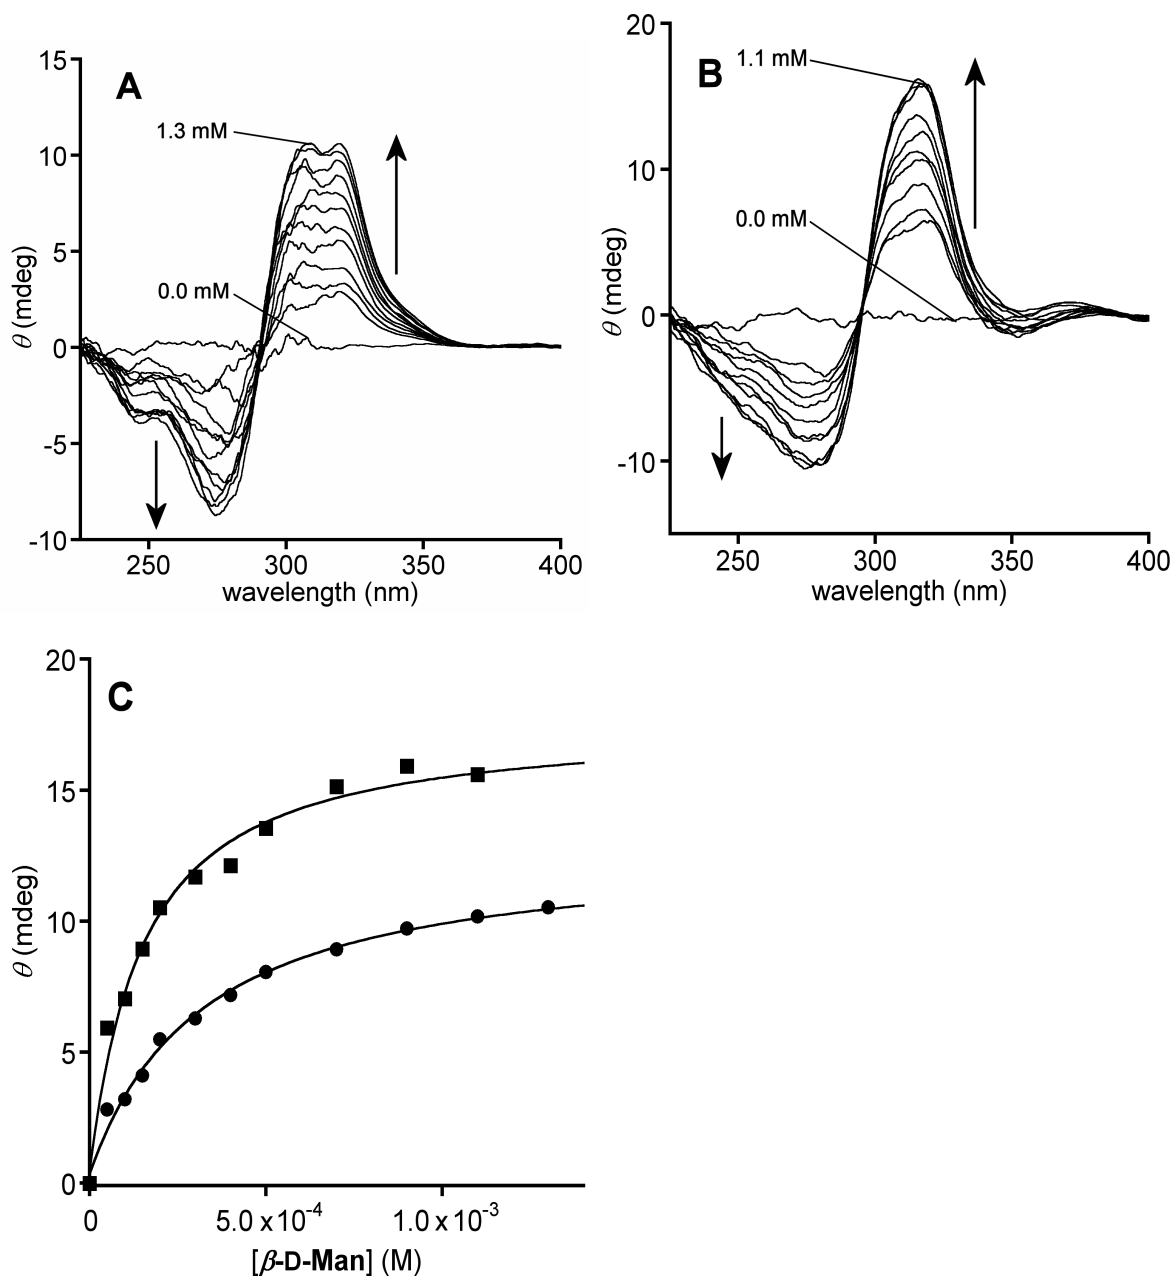

**Figure S7.** The change of the CD spectrum on the titration of **2** (1.0 mM, unit concentration) with  $\beta$ -D-Man in  $\text{CH}_2\text{Cl}_2$  at 26 °C in the (A) absence or (B) presence of TFA (0.5 mM). Light path length = 1 mm. (C) The titration curves in the absence (circles, 318 nm was observed) or presence (squares, 314 nm was observed) of TFA. The lines are theoretical curves obtained by the iterative curve-fitting analyses assuming 1:1 complexation between **2** and  $\beta$ -D-Man and the molecular weight of **2** as  $1.1 \times 10^4 \text{ g mol}^{-1}$ .

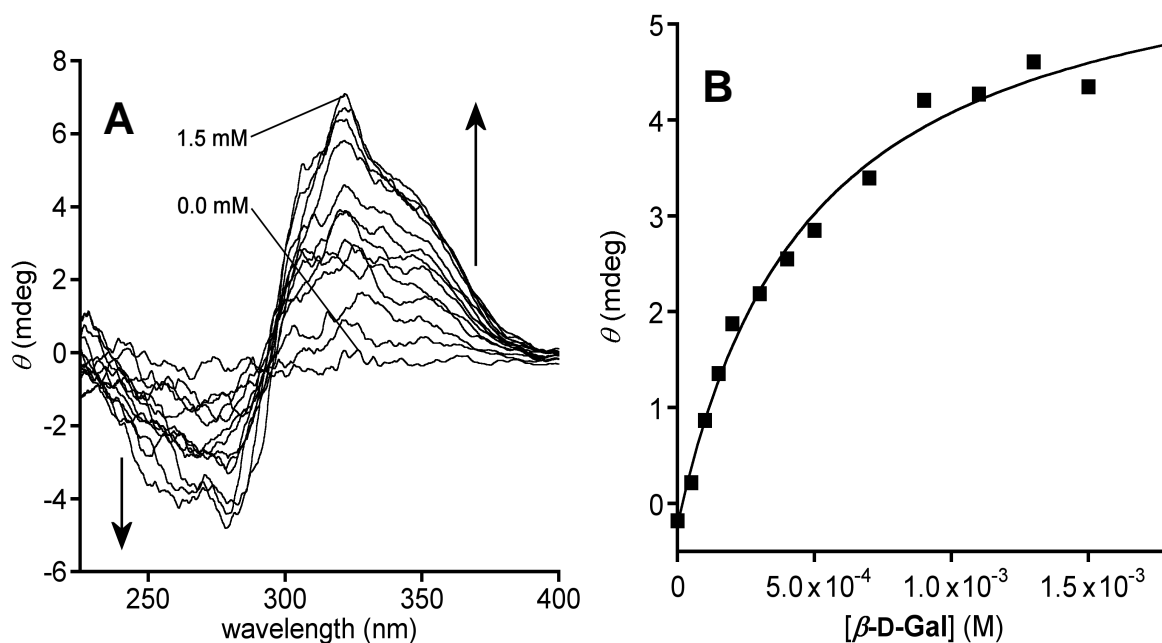

**Figure S8.** (A) The change of the CD spectrum on the titration of **2** (1.0 mM, unit concentration) with  $\beta$ -D-Gal in  $\text{CH}_2\text{Cl}_2$  at 26 °C in the presence of TFA (0.5 mM). Light path length = 1 mm. (B) The titration curves in the presence (343 nm was observed) of TFA. The lines are theoretical curves obtained by the iterative curve-fitting analyses assuming 1:1 complexation between **2** and  $\beta$ -D-Gal and the molecular weight of **2** as  $1.1 \times 10^4 \text{ g mol}^{-1}$ .

**<sup>1</sup>H NMR spectrum for polymer 2 and the additive effect of TFA**

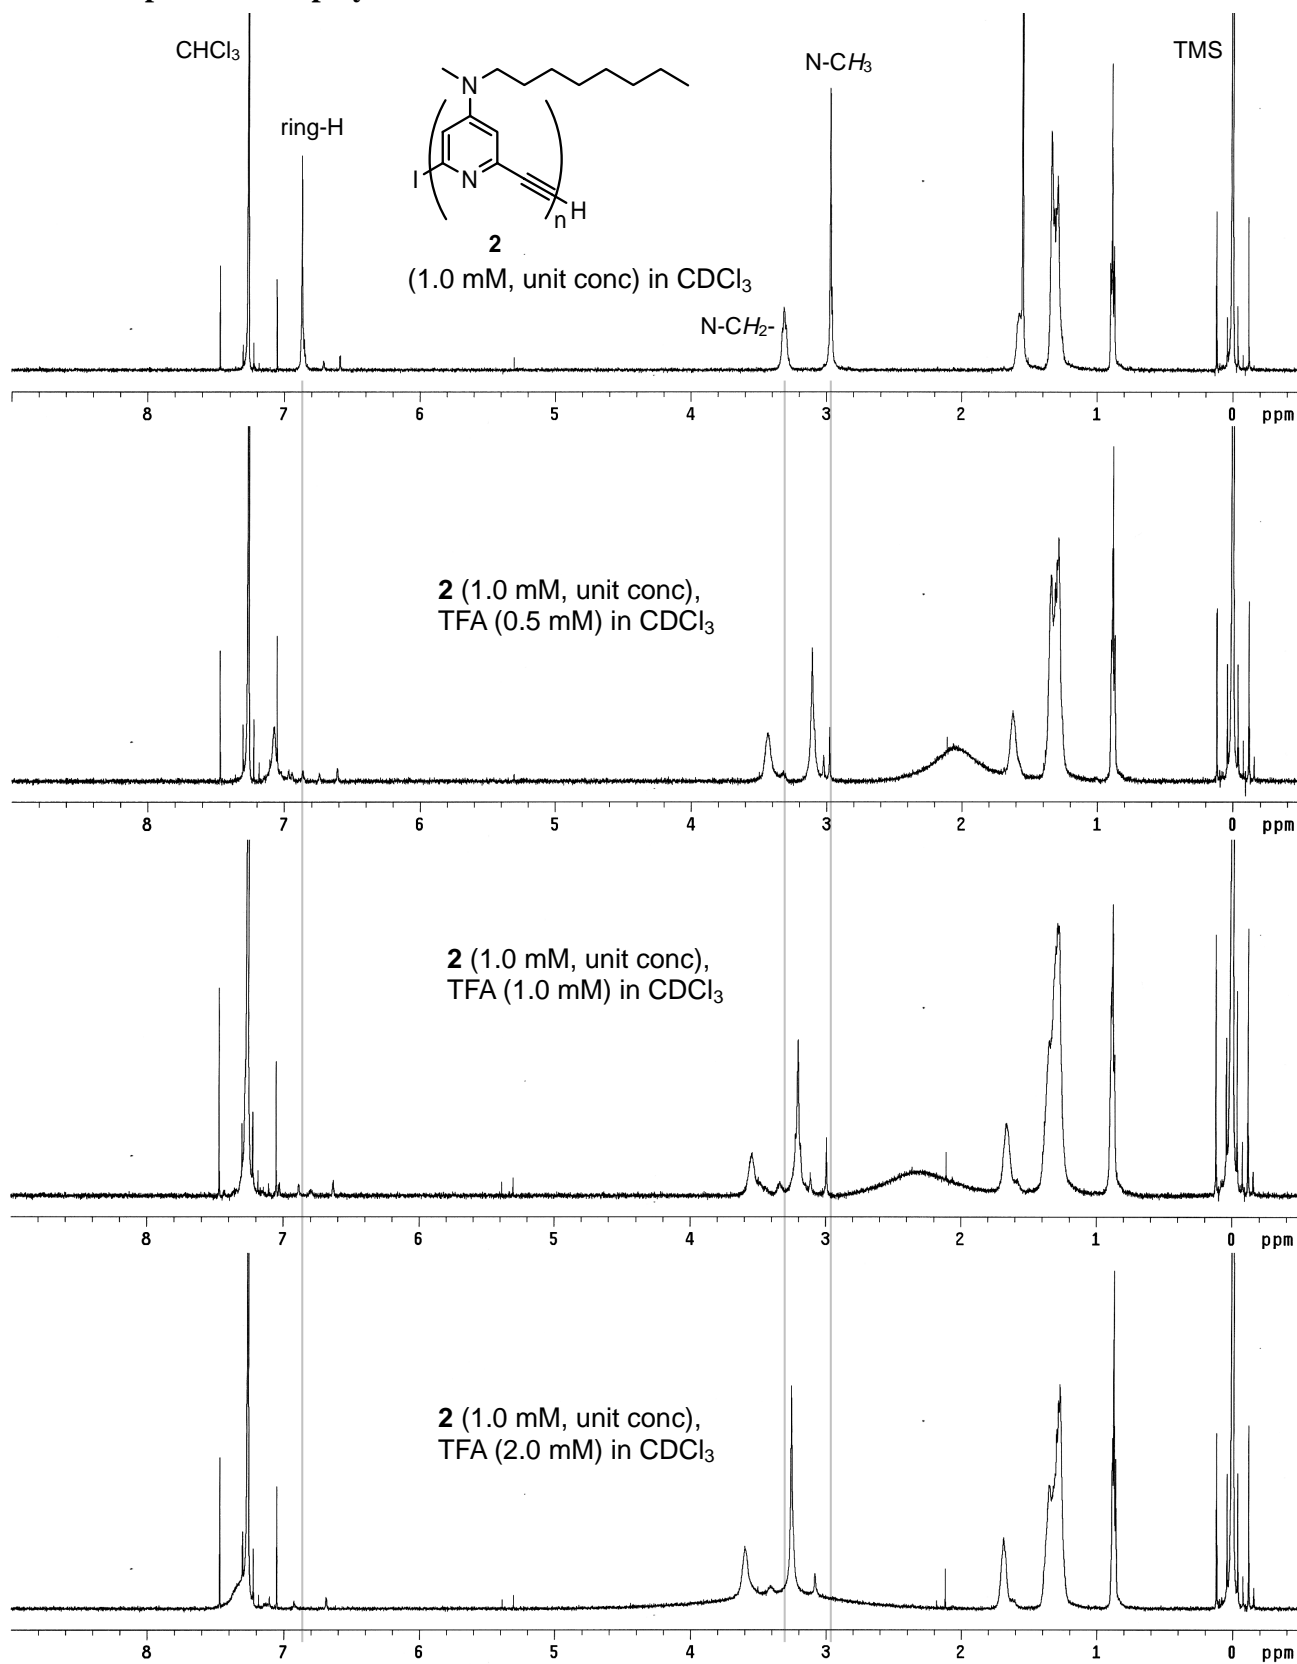

\*Gray lines are guides to know downfield movement of peaks.

**<sup>1</sup>H NMR spectra for compounds 5, 7, 8, 9, and 11**

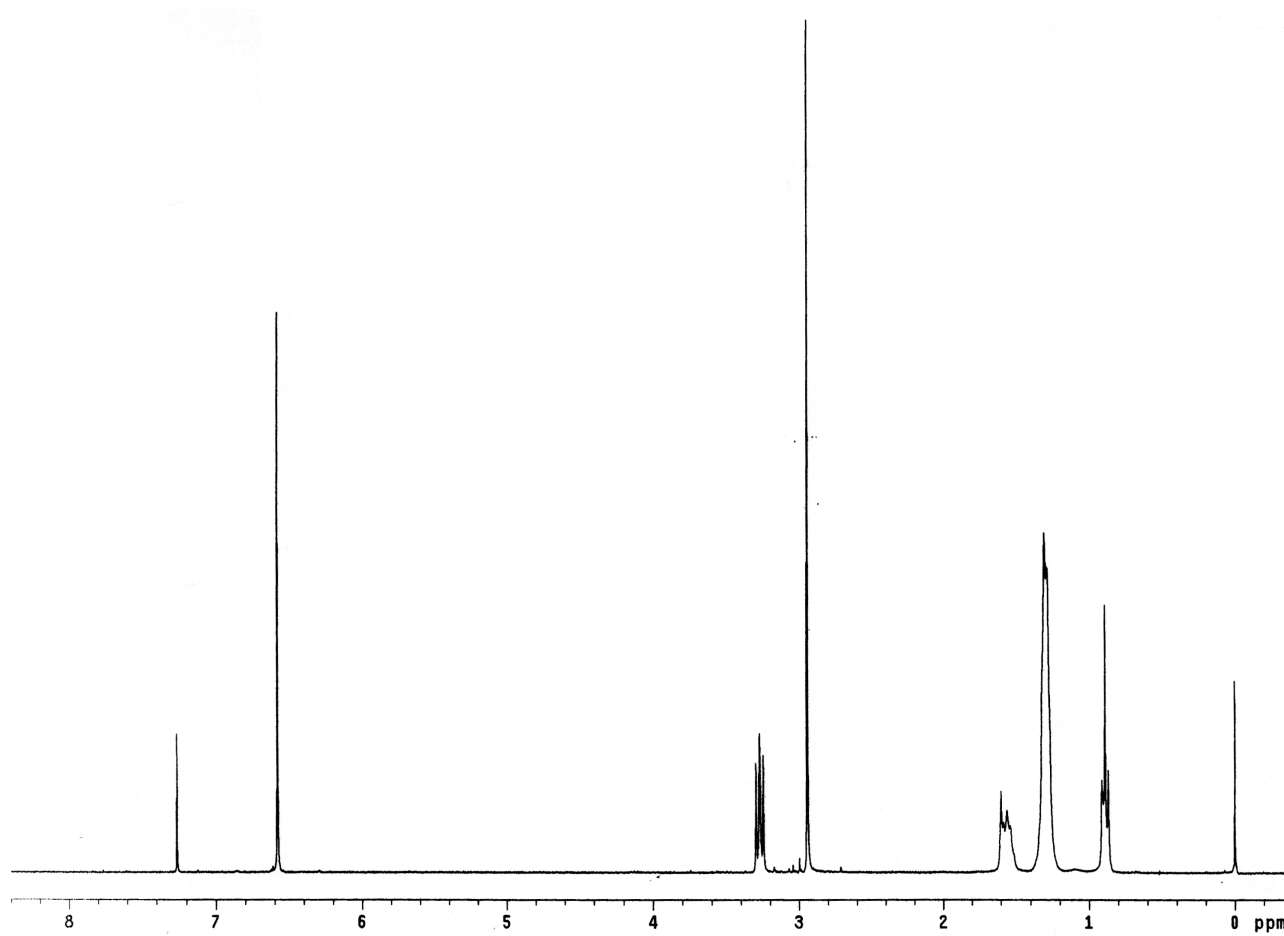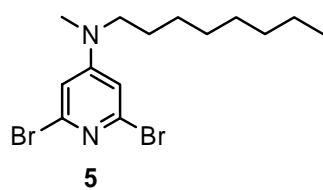

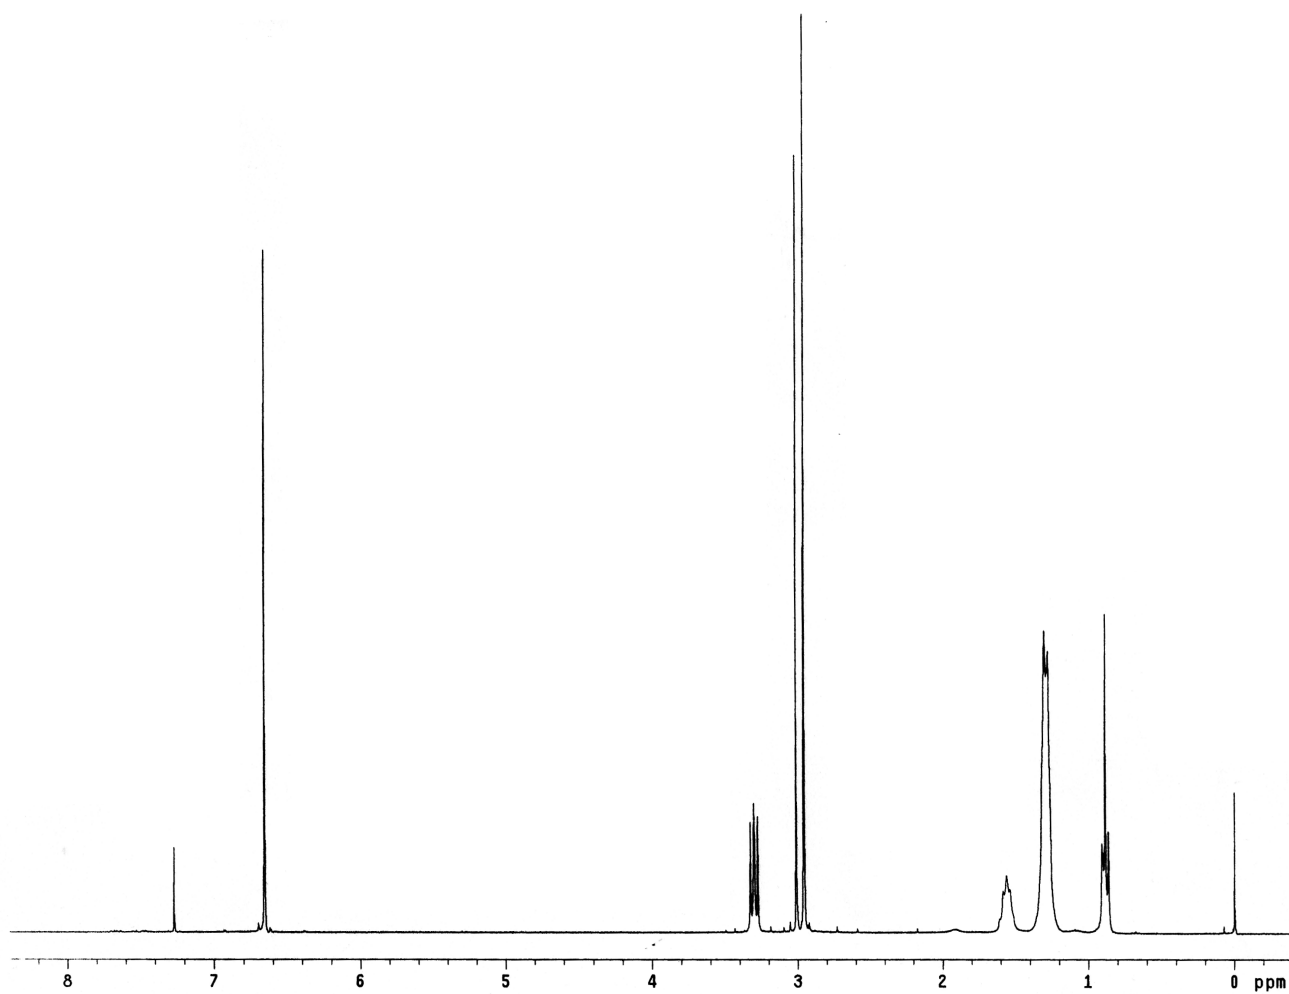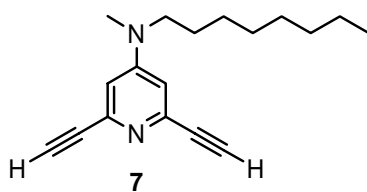

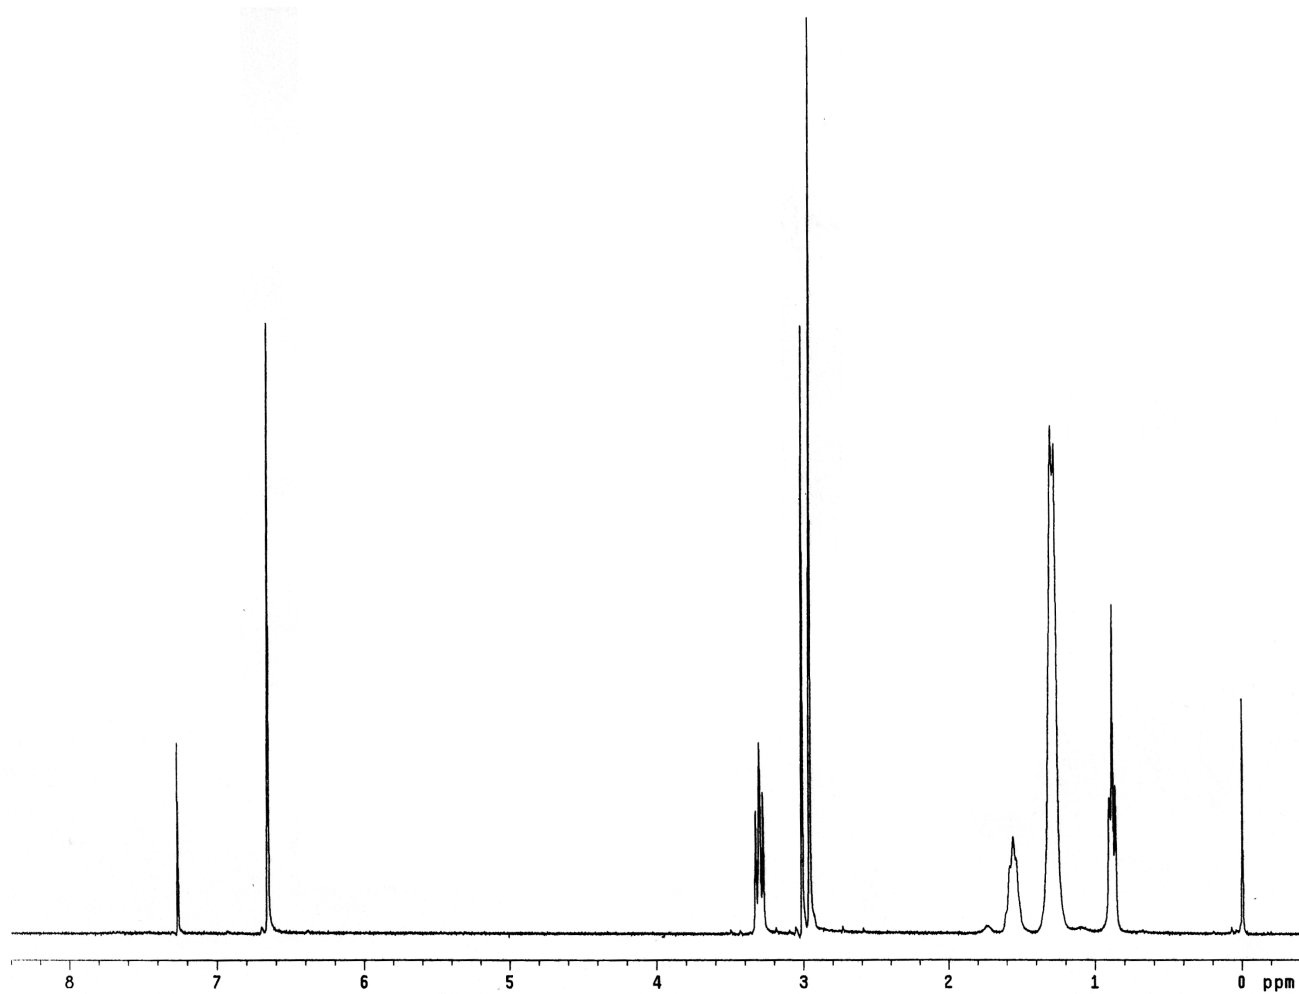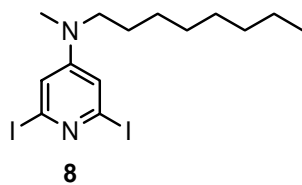



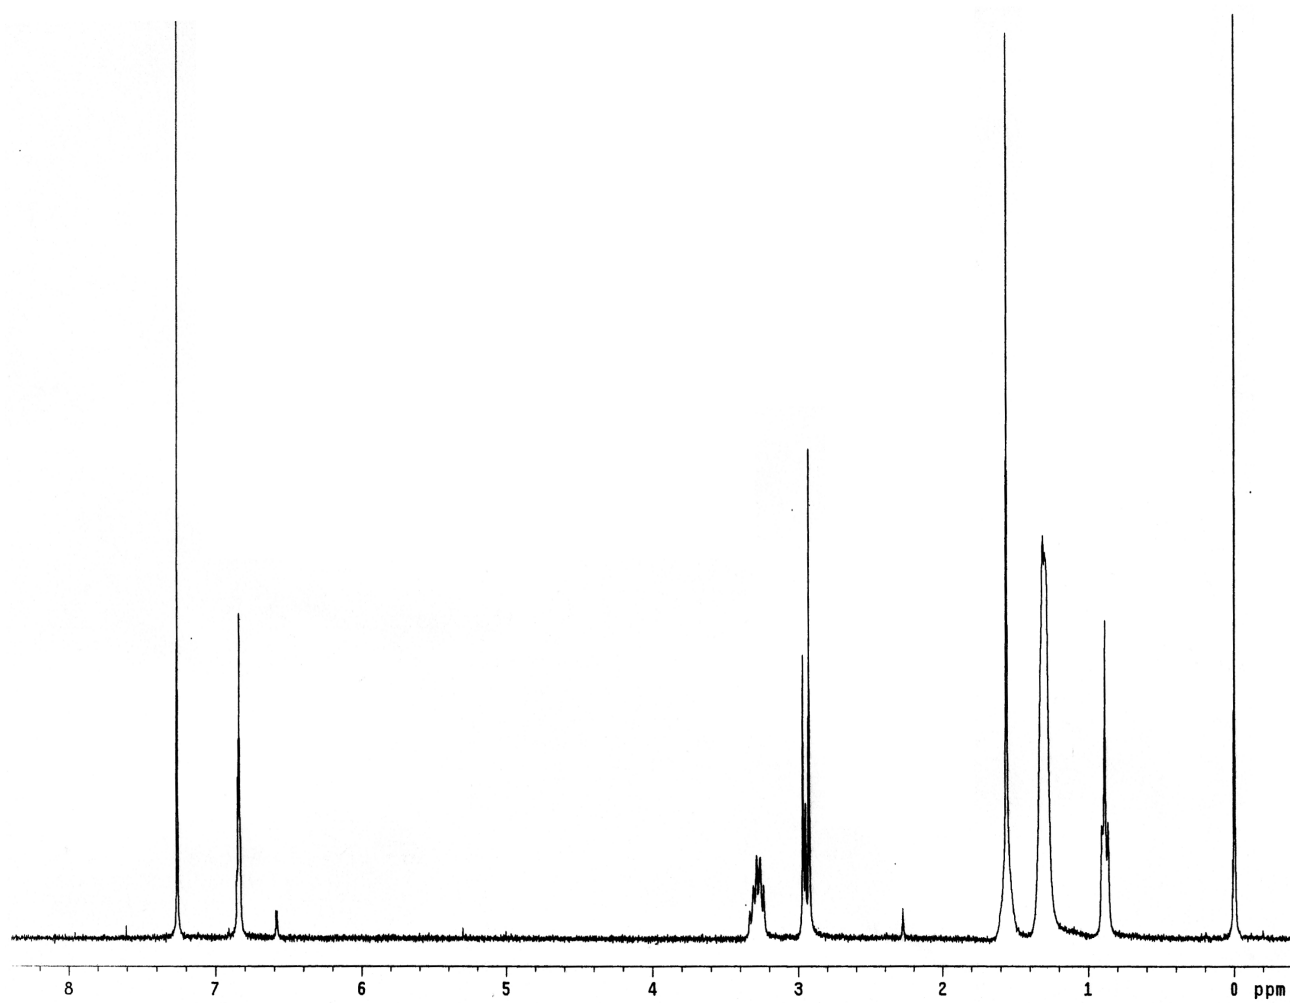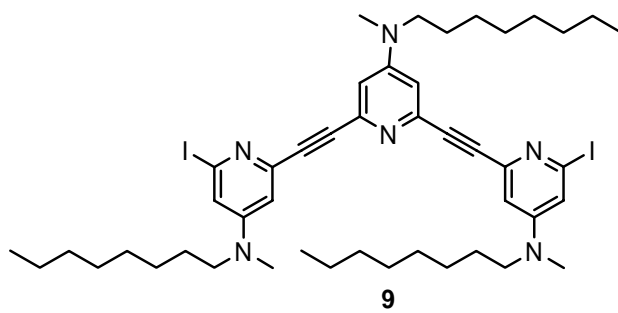

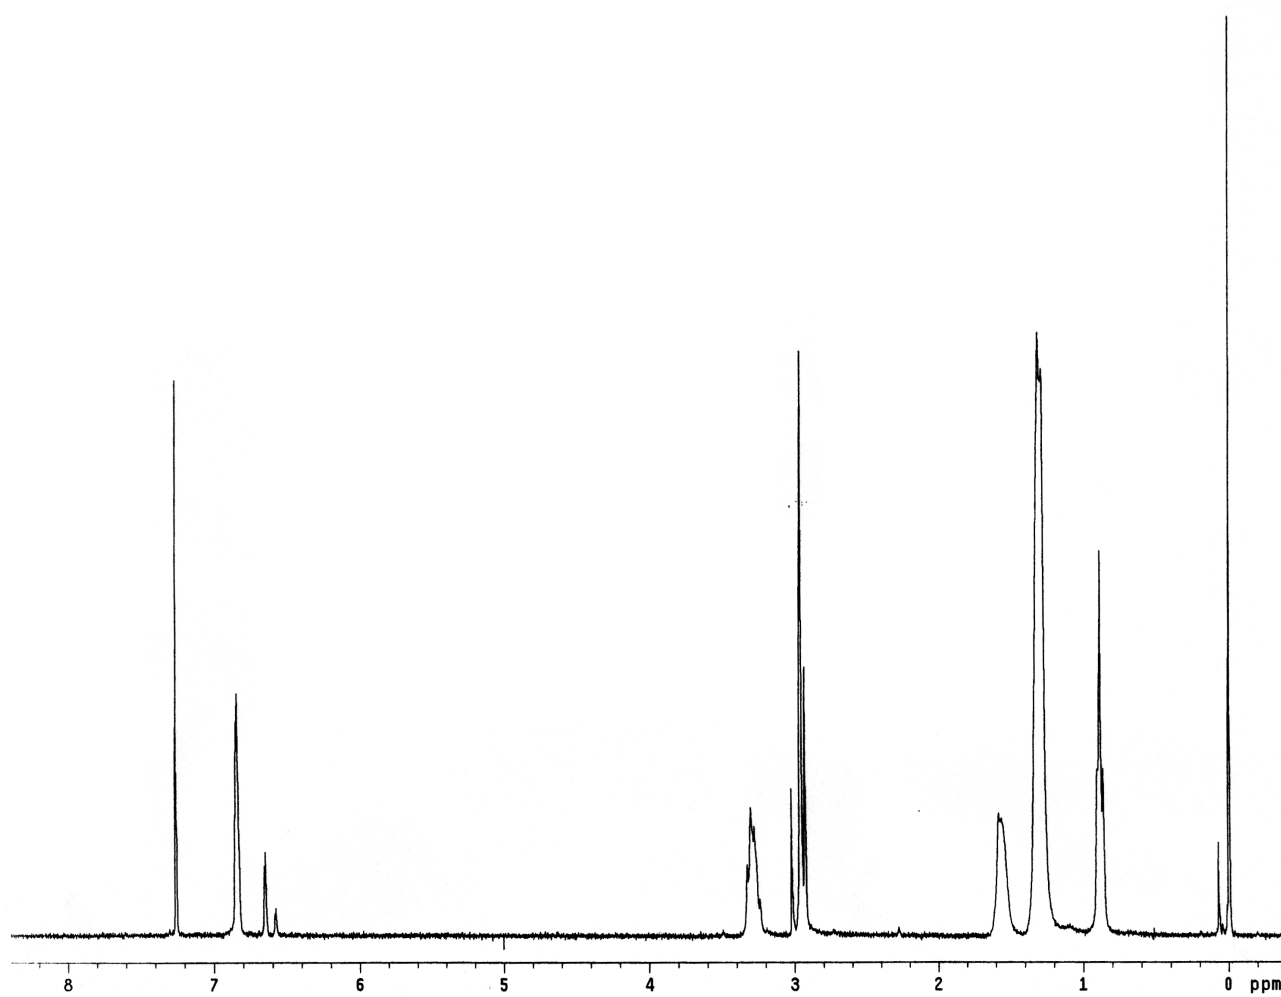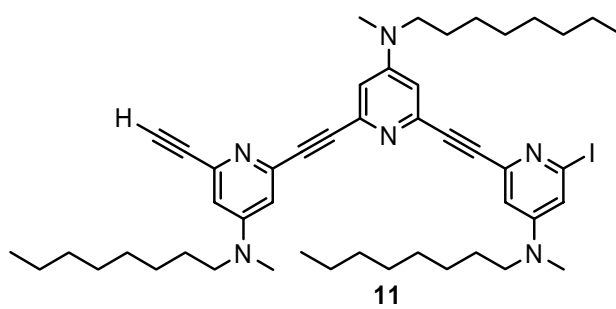

**Total energy, zero point energy correction (ZPE), and optimized geometry obtained by DFT method.**

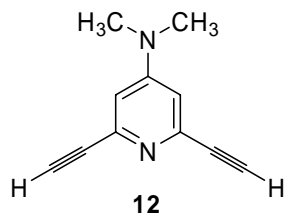

Total energy = -534.699903166 hartree

Zero-point energy correction (ZPE) = 0.179477 hartree

Total energy including ZPE = -534.520426 hartree

The optimized Cartesian coordinate:

| Atomic<br>Type | Coordinates (Angstroms) |           |           |
|----------------|-------------------------|-----------|-----------|
|                | X                       | Y         | Z         |
| C              | 0.000000                | 0.000000  | 0.000000  |
| C              | 0.000000                | 0.000000  | 1.399663  |
| C              | 1.227157                | 0.000000  | 2.096954  |
| C              | 2.393044                | -0.015402 | 1.301594  |
| C              | 2.278529                | -0.014690 | -0.093373 |
| H              | -0.949349               | -0.001190 | 1.918476  |
| H              | 3.381570                | -0.029126 | 1.740982  |
| N              | 1.110001                | -0.005830 | -0.761002 |
| C              | 2.568347                | -0.088851 | 4.144412  |
| H              | 3.238492                | 0.729124  | 3.852072  |
| H              | 2.412355                | -0.022552 | 5.222280  |
| H              | 3.076110                | -1.040481 | 3.928787  |
| C              | 0.056829                | -0.073106 | 4.247177  |
| H              | 0.301180                | -0.009638 | 5.308680  |
| H              | -0.624590               | 0.753485  | 4.010352  |
| H              | -0.478829               | -1.018088 | 4.074008  |
| N              | 1.283531                | 0.016801  | 3.470628  |
| C              | 3.478660                | -0.026563 | -0.885732 |
| C              | -1.260997               | 0.004068  | -0.691493 |
| C              | -2.335845               | 0.008276  | -1.244421 |
| H              | -3.272817               | 0.011596  | -1.753497 |
| C              | 4.504625                | -0.035968 | -1.524760 |
| H              | 5.396769                | -0.044477 | -2.108788 |

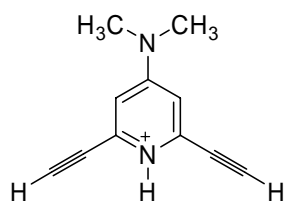

Total energy = -535.096467900 hartree

Zero-point energy correction (ZPE) = 0.193702 hartree

Total energy including ZPE = -534.902766 hartree

The optimized Cartesian coordinate:

| Atomic<br>Type | Coordinates (Angstroms) |           |           |
|----------------|-------------------------|-----------|-----------|
|                | X                       | Y         | Z         |
| C              | 0.000000                | 0.000000  | 0.000000  |
| C              | 0.000000                | 0.000000  | 1.378889  |
| C              | 1.226464                | 0.000000  | 2.111581  |
| C              | 2.434100                | 0.000653  | 1.348231  |
| C              | 2.399374                | 0.000645  | -0.030223 |
| H              | -0.957260               | 0.000116  | 1.879242  |
| H              | 3.403660                | 0.001285  | 1.824291  |
| C              | 2.518072                | -0.001118 | 4.185530  |
| H              | 3.106378                | 0.892488  | 3.950052  |
| H              | 2.312575                | -0.001634 | 5.254569  |
| H              | 3.106124                | -0.894613 | 3.948973  |
| C              | -0.012913               | -0.001809 | 4.217050  |
| H              | 0.219133                | -0.002242 | 5.280642  |
| H              | -0.607368               | 0.891490  | 3.996305  |
| H              | -0.606195               | -0.895607 | 3.995154  |
| N              | 1.243292                | -0.000453 | 3.455905  |
| C              | 3.565605                | 0.001180  | -0.839004 |
| C              | -1.186233               | -0.000096 | -0.779150 |
| C              | -2.188373               | 0.000081  | -1.454260 |
| H              | -3.079639               | 0.000063  | -2.045720 |
| C              | 4.550423                | 0.001896  | -1.539142 |
| H              | 5.426509                | 0.002363  | -2.152863 |
| N              | 1.191335                | 0.000000  | -0.678143 |
| H              | 1.178561                | 0.000000  | -1.692315 |

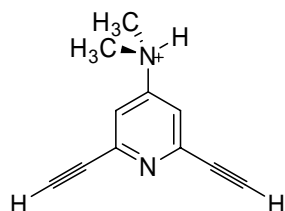

**12H<sup>+</sup>-amino**

Total energy = -535.050747905 hartree

Zero-point energy correction (ZPE) = 0.194090 hartree

Total energy including ZPE = -534.856658 hartree

The optimized Cartesian coordinate:

| Atomic<br>Type | Coordinates (Angstroms) |           |           |
|----------------|-------------------------|-----------|-----------|
|                | X                       | Y         | Z         |
| C              | 0.000000                | 0.000000  | 0.000000  |
| C              | 0.000000                | 0.000000  | 1.413053  |
| C              | 1.232110                | 0.000000  | 2.045458  |
| C              | 2.418371                | 0.000135  | 1.327882  |
| C              | 2.311910                | 0.000412  | -0.079941 |
| H              | -0.941279               | -0.000051 | 1.955331  |
| H              | 3.397937                | 0.000138  | 1.792198  |

|   |           |           |           |
|---|-----------|-----------|-----------|
| N | 1.131441  | 0.000250  | -0.722096 |
| C | 1.884386  | 1.254911  | 4.108658  |
| H | 1.367181  | 2.117759  | 3.688390  |
| H | 1.777727  | 1.229655  | 5.194347  |
| H | 2.937987  | 1.276168  | 3.832320  |
| C | 1.884337  | -1.255693 | 4.108092  |
| H | 1.777499  | -1.231051 | 5.193775  |
| H | 1.367237  | -2.118329 | 3.687259  |
| H | 2.937974  | -1.276752 | 3.831861  |
| C | 3.499356  | 0.000278  | -0.872709 |
| C | -1.241908 | 0.000273  | -0.703389 |
| C | -2.305520 | 0.000723  | -1.276668 |
| H | -3.235144 | 0.001014  | -1.803862 |
| C | 4.518008  | 0.000596  | -1.522464 |
| H | 5.405999  | 0.000654  | -2.117068 |
| N | 1.260422  | -0.000235 | 3.537327  |
| H | 0.279119  | -0.000253 | 3.836531  |

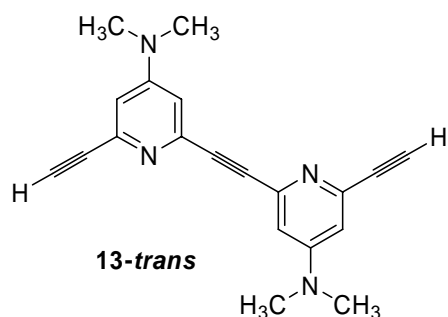

Total energy = -992.044458405 hartree

Zero-point energy correction (ZPE) = 0.331603 hartree

Total energy including ZPE = -991.712855 hartree

The optimized Cartesian coordinate:

| Atomic Type | Coordinates (Angstroms) |           |           |
|-------------|-------------------------|-----------|-----------|
|             | X                       | Y         | Z         |
| C           | 0.000000                | 0.000000  | 0.000000  |
| C           | 0.000000                | 0.000000  | 2.281733  |
| C           | 1.399824                | 0.000000  | 2.337291  |
| C           | 2.145866                | -0.006421 | 1.139894  |
| C           | 1.398824                | 0.000491  | -0.058036 |
| H           | 1.878294                | 0.006733  | 3.307495  |
| H           | 1.878375                | 0.007642  | -1.027769 |
| C           | -0.736601               | 0.005043  | 3.510753  |
| C           | -1.320160               | 0.010165  | 4.574991  |
| C           | -2.056797               | 0.017412  | 5.803981  |
| C           | -3.456620               | 0.022147  | 5.748326  |
| C           | -4.202754               | 0.027583  | 6.945656  |
| H           | -3.934960               | 0.023362  | 4.778038  |
| C           | -2.056904               | 0.035302  | 8.085623  |
| C           | -3.455720               | 0.041392  | 8.143536  |
| H           | -3.935246               | 0.058196  | 9.113159  |
| N           | -0.715457               | -0.001277 | 1.139125  |

|   |           |           |           |
|---|-----------|-----------|-----------|
| N | -1.341400 | 0.022370  | 6.946603  |
| C | 4.245891  | 0.075827  | -0.116622 |
| H | 4.042273  | 1.019076  | -0.644625 |
| H | 5.317085  | 0.022727  | 0.084203  |
| H | 3.989499  | -0.753007 | -0.788534 |
| C | -6.302507 | 0.129408  | 8.201181  |
| H | -6.096828 | 1.077698  | 8.719342  |
| H | -7.373835 | 0.076343  | 8.001024  |
| H | -6.047781 | -0.692928 | 8.881582  |
| C | -0.742083 | 0.003897  | -1.232574 |
| C | -1.314878 | 0.046297  | 9.318191  |
| C | -1.338005 | 0.006840  | -2.284300 |
| H | -1.883020 | 0.009613  | -3.200764 |
| C | -0.719086 | 0.055423  | 10.369954 |
| H | -0.174108 | 0.063477  | 11.286409 |
| N | 3.520687  | -0.020244 | 1.140211  |
| N | -5.577687 | 0.018275  | 6.945350  |
| C | 4.245436  | 0.073674  | 2.398392  |
| H | 5.316625  | 0.020314  | 2.197770  |
| H | 4.041073  | 1.015936  | 2.927278  |
| H | 3.987931  | -0.755853 | 3.068572  |
| C | -6.301960 | 0.108032  | 5.686581  |
| H | -6.095496 | 1.047307  | 5.153128  |
| H | -6.046118 | -0.725284 | 5.020573  |
| H | -7.373304 | 0.057785  | 5.887240  |

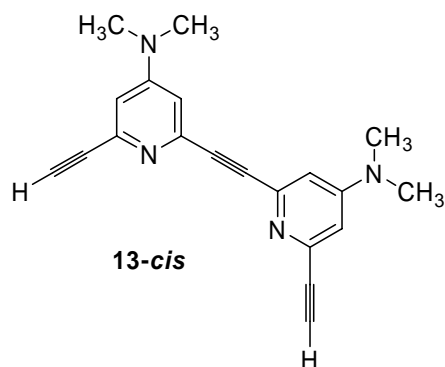

Total energy = -992.041457988 hartree

Zero-point energy correction (ZPE) = 0.331360 hartree

Total energy including ZPE = -991.710098 hartree

The optimized Cartesian coordinate:

| Atomic<br>Type | Coordinates (Angstroms) |           |           |
|----------------|-------------------------|-----------|-----------|
|                | X                       | Y         | Z         |
| C              | 0.000000                | 0.000000  | 0.000000  |
| C              | 0.000000                | 0.000000  | 2.281984  |
| C              | 1.400779                | 0.000000  | 2.335400  |
| C              | 2.146304                | 0.008464  | 1.137851  |
| C              | 1.399040                | 0.000174  | -0.059031 |
| H              | 1.882270                | -0.008122 | 3.304285  |
| H              | 1.877686                | -0.007030 | -1.029239 |
| C              | -0.737459               | -0.004951 | 3.511321  |

|   |           |           |           |
|---|-----------|-----------|-----------|
| C | -1.343159 | -0.008605 | 4.563346  |
| C | -2.036071 | -0.014228 | 5.818332  |
| C | -1.286815 | -0.045175 | 7.002678  |
| C | -1.948287 | -0.054831 | 8.248626  |
| H | -0.207223 | -0.059535 | 6.932531  |
| C | -4.009202 | 0.013916  | 6.964391  |
| C | -3.358072 | -0.015777 | 8.203717  |
| H | -3.956555 | -0.007097 | 9.104942  |
| N | -0.713944 | 0.001410  | 1.139565  |
| N | -3.382236 | 0.013907  | 5.774745  |
| C | 4.246208  | -0.089653 | -0.120114 |
| H | 3.987413  | 0.728035  | -0.804161 |
| H | 5.317517  | -0.030690 | 0.078666  |
| H | 4.043466  | -1.041406 | -0.633160 |
| C | -1.980029 | 0.011348  | 10.697398 |
| H | -2.717087 | -0.793859 | 10.806863 |
| H | -1.271389 | -0.071587 | 11.523004 |
| H | -2.507184 | 0.972206  | 10.791957 |
| C | -0.742915 | -0.004773 | -1.231694 |
| C | -5.446966 | 0.049866  | 6.940658  |
| C | -1.339467 | -0.008575 | -2.282920 |
| H | -1.889015 | -0.012065 | -3.196713 |
| C | -6.655246 | 0.079450  | 6.952853  |
| H | -7.721109 | 0.106024  | 6.936680  |
| N | -1.259246 | -0.102362 | 9.439039  |
| N | 3.522526  | 0.026659  | 1.136360  |
| C | 0.192858  | -0.029419 | 9.436784  |
| H | 0.629600  | -0.849665 | 8.853560  |
| H | 0.564288  | 0.919868  | 9.022618  |
| H | 0.556402  | -0.119699 | 10.461677 |
| C | 4.247725  | -0.080131 | 2.392017  |
| H | 3.980056  | 0.736260  | 3.074280  |
| H | 4.055787  | -1.033084 | 2.907510  |
| H | 5.318314  | -0.009655 | 2.192997  |

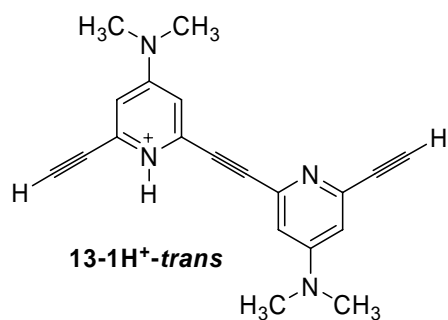

Total energy = -992.451090698 hartree

Zero-point energy correction (ZPE) = 0.345926 hartree

Total energy including ZPE = -992.105165 hartree

The optimized Cartesian coordinate:

| Atomic<br>Type | Coordinates (Angstroms) |          |          |
|----------------|-------------------------|----------|----------|
|                | X                       | Y        | Z        |
| C              | 0.000000                | 0.000000 | 0.000000 |

|   |           |           |           |
|---|-----------|-----------|-----------|
| C | 0.000000  | 0.000000  | 2.275305  |
| C | 1.395172  | 0.000000  | 2.356717  |
| C | 2.150674  | -0.000117 | 1.158291  |
| C | 1.400841  | 0.000000  | -0.040111 |
| H | 1.871204  | 0.000131  | 3.328350  |
| H | 1.886302  | 0.000195  | -1.006813 |
| C | -0.779150 | 0.000121  | 3.477122  |
| C | -1.472454 | -0.000003 | 4.476828  |
| C | -2.349984 | 0.000036  | 5.578272  |
| C | -3.729031 | 0.000268  | 5.443864  |
| C | -4.578834 | 0.000169  | 6.584966  |
| H | -4.126913 | 0.000502  | 4.439766  |
| C | -2.572136 | -0.000184 | 7.972673  |
| C | -3.945215 | 0.000075  | 7.867662  |
| H | -4.518783 | 0.000252  | 8.782727  |
| N | -0.719834 | 0.000000  | 1.137771  |
| C | 4.249601  | 0.000643  | -0.099777 |
| H | 4.021320  | 0.892190  | -0.697680 |
| H | 5.319254  | -0.000681 | 0.110240  |
| H | 4.019667  | -0.889045 | -0.699746 |
| C | -6.774795 | 0.000018  | 7.660024  |
| H | -6.601446 | 0.893437  | 8.270299  |
| H | -7.817963 | -0.000868 | 7.347922  |
| H | -6.600163 | -0.892775 | 8.270821  |
| C | -0.731193 | 0.000207  | -1.234581 |
| C | -1.887072 | -0.000335 | 9.217235  |
| C | -1.320334 | 0.000347  | -2.289451 |
| H | -1.851087 | 0.000495  | -3.215395 |
| C | -1.292885 | -0.000337 | 10.269322 |
| H | -0.774568 | -0.000414 | 11.204499 |
| N | 3.516038  | -0.000367 | 1.161773  |
| N | -5.921207 | 0.000218  | 6.466914  |
| C | 4.243849  | 0.000830  | 2.423958  |
| H | 5.314368  | -0.000229 | 2.218700  |
| H | 4.014994  | 0.892969  | 3.022108  |
| H | 4.013776  | -0.889542 | 3.024213  |
| C | -6.547937 | 0.000772  | 5.140068  |
| H | -6.265241 | 0.893560  | 4.571314  |
| H | -6.265418 | -0.891666 | 4.570682  |
| H | -7.630101 | 0.000856  | 5.260146  |
| N | -1.802693 | -0.000241 | 6.837961  |
| H | -0.793540 | -0.000545 | 6.930670  |

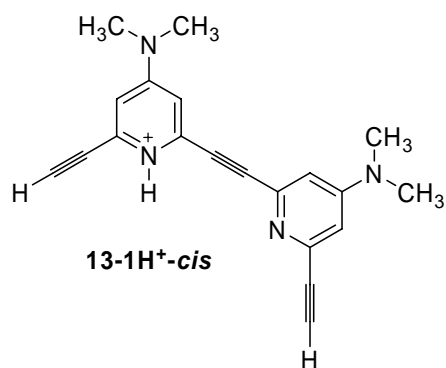



Total energy = -992.451701191 hartree  
 Zero-point energy correction (ZPE) = 0.346110 hartree  
 Total energy including ZPE = -992.105591 hartree

The optimized Cartesian coordinate:

| Atomic<br>Type | Coordinates (Angstroms) |           |           |
|----------------|-------------------------|-----------|-----------|
|                | X                       | Y         | Z         |
| C              | 0.000000                | 0.000000  | 0.000000  |
| C              | 0.000000                | 0.000000  | 2.404943  |
| C              | 1.384918                | 0.000000  | 2.412735  |
| C              | 2.125610                | 0.000000  | 1.197116  |
| C              | 1.377794                | 0.000000  | -0.021303 |
| H              | 1.877007                | 0.000000  | 3.373990  |
| H              | 1.865337                | 0.000000  | -0.984853 |
| C              | -0.804449               | 0.000000  | 3.560815  |
| C              | -1.592430               | 0.000310  | 4.487605  |
| C              | -2.554334               | 0.000565  | 5.548430  |
| C              | -2.120329               | 0.000669  | 6.876482  |
| C              | -3.087682               | 0.001036  | 7.911423  |
| H              | -1.059402               | 0.000357  | 7.088618  |
| C              | -4.755319               | 0.000950  | 6.126072  |
| C              | -4.437599               | 0.001050  | 7.490906  |
| H              | -5.248671               | 0.001098  | 8.206507  |
| N              | -3.837733               | 0.000710  | 5.140697  |
| C              | 4.212571                | 0.000000  | -0.077688 |
| H              | 3.982312                | 0.893063  | -0.669326 |
| H              | 5.280379                | -0.000064 | 0.135561  |
| H              | 3.982219                | -0.892990 | -0.669397 |
| C              | -3.773143               | 0.001483  | 10.259937 |
| H              | -4.410161               | -0.889451 | 10.190326 |
| H              | -3.299550               | 0.002451  | 11.241779 |
| H              | -4.410932               | 0.891725  | 10.188979 |
| C              | -0.796324               | 0.000000  | -1.176080 |
| C              | -6.135128               | 0.000938  | 5.732434  |
| C              | -1.488005               | 0.000012  | -2.166726 |
| H              | -2.095009               | 0.000045  | -3.046981 |
| C              | -7.304974               | 0.000908  | 5.430231  |
| H              | -8.335379               | 0.000871  | 5.152061  |
| N              | -0.660185               | 0.000000  | 1.199905  |
| H              | -1.674767               | 0.000000  | 1.206283  |
| N              | 3.473972                | 0.000000  | 1.189963  |
| C              | 4.221502                | 0.000000  | 2.451480  |
| H              | 3.994034                | 0.892930  | 3.044652  |
| H              | 3.993937                | -0.892869 | 3.044705  |
| H              | 5.287826                | -0.000070 | 2.231199  |
| N              | -2.738198               | 0.001287  | 9.231168  |
| C              | -1.332727               | 0.000574  | 9.615770  |
| H              | -0.811660               | -0.891092 | 9.242569  |
| H              | -0.810658               | 0.891355  | 9.241878  |
| H              | -1.260366               | 0.000982  | 10.703393 |

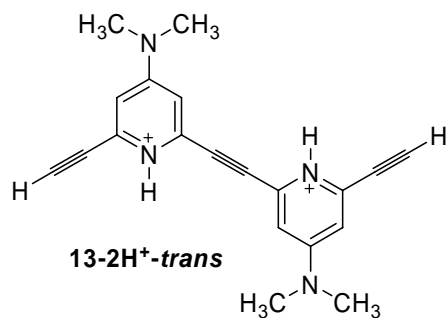

Total energy = -992.764084489 hartree

Zero-point energy correction (ZPE) = 0.359965 hartree

Total energy including ZPE = -992.404119 hartree

The optimized Cartesian coordinate:

| Atomic<br>Type | Coordinates (Angstroms) |           |           |
|----------------|-------------------------|-----------|-----------|
|                | X                       | Y         | Z         |
| C              | 0.000000                | 0.000000  | 0.000000  |
| C              | 0.000000                | 0.000000  | 2.399587  |
| C              | 1.377076                | 0.000000  | 2.422388  |
| C              | 2.130709                | -0.000069 | 1.200971  |
| C              | 1.379610                | 0.000000  | -0.014200 |
| H              | 1.870045                | 0.000062  | 3.383521  |
| H              | 1.867965                | 0.000077  | -0.977734 |
| C              | -0.790346               | 0.000039  | 3.583136  |
| C              | -1.481339               | -0.000012 | 4.581927  |
| C              | -2.271672               | -0.000006 | 5.765488  |
| C              | -3.648743               | 0.001347  | 5.742724  |
| C              | -4.402342               | 0.001293  | 6.964159  |
| H              | -4.141743               | 0.002445  | 4.781606  |
| C              | -2.271607               | -0.001568 | 8.165072  |
| C              | -3.651217               | -0.000222 | 8.179313  |
| H              | -4.139541               | -0.000326 | 9.142861  |
| C              | 4.217624                | -0.000088 | -0.067195 |
| H              | 3.987170                | 0.894847  | -0.654559 |
| H              | 5.283861                | -0.000896 | 0.150751  |
| H              | 3.986036                | -0.894213 | -0.655327 |
| C              | -6.489287               | 0.002373  | 8.232311  |
| H              | -6.257803               | 0.896499  | 8.820497  |
| H              | -7.555515               | 0.003032  | 8.014324  |
| H              | -6.258769               | -0.892564 | 8.819630  |
| C              | -0.789241               | 0.000066  | -1.176933 |
| C              | -1.482362               | -0.003074 | 9.342010  |
| C              | -1.462327               | 0.000109  | -2.180959 |
| H              | -2.049864               | 0.000145  | -3.076131 |
| C              | -0.809707               | -0.004327 | 10.346323 |
| H              | -0.222358               | -0.005453 | 11.241619 |
| N              | 3.470819                | -0.000197 | 1.202225  |
| N              | -5.742453               | 0.002596  | 6.962902  |
| C              | 4.222157                | 0.000016  | 2.466403  |
| H              | 5.287344                | -0.000610 | 2.243455  |
| H              | 3.997108                | 0.895786  | 3.055205  |
| H              | 3.996275                | -0.895034 | 3.055965  |
| C              | -6.493773               | 0.004367  | 5.698711  |
| H              | -6.267279               | 0.899950  | 5.110188  |

|   |           |           |          |
|---|-----------|-----------|----------|
| H | -6.269317 | -0.890872 | 5.108882 |
| H | -7.558958 | 0.005421  | 5.921661 |
| N | -1.604584 | -0.001446 | 6.964395 |
| H | -0.591047 | -0.002452 | 6.975841 |
| N | -0.667052 | -0.000035 | 1.200666 |
| H | -1.680591 | -0.000042 | 1.189188 |

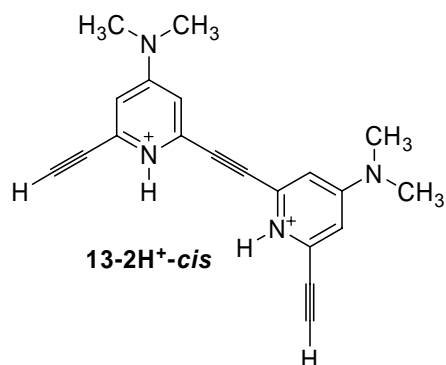

Total energy = -992.763794096 hartree

Zero-point energy correction (ZPE) = 0.359763 hartree

Total energy including ZPE = -992.404031 hartree

The optimized Cartesian coordinate:

| Atomic Type | Coordinates (Angstroms) |           |           |
|-------------|-------------------------|-----------|-----------|
|             | X                       | Y         | Z         |
| C           | 0.000000                | 0.000000  | 0.000000  |
| C           | 0.000000                | 0.000000  | 2.399651  |
| C           | 1.377222                | 0.000000  | 2.422277  |
| C           | 2.130836                | 0.000000  | 1.200889  |
| C           | 1.379494                | 0.000000  | -0.014189 |
| H           | 1.868903                | 0.000000  | 3.384216  |
| H           | 1.866969                | 0.000000  | -0.978273 |
| C           | -0.786000               | 0.000000  | 3.586159  |
| C           | -1.448972               | 0.000095  | 4.603789  |
| C           | -2.216022               | 0.000130  | 5.802633  |
| C           | -1.637958               | 0.000643  | 7.052882  |
| C           | -2.449874               | 0.000658  | 8.236347  |
| H           | -0.559334               | 0.001031  | 7.113157  |
| C           | -4.410388               | -0.000365 | 6.773780  |
| C           | -3.865073               | 0.000122  | 8.041000  |
| H           | -4.549438               | 0.000097  | 8.876904  |
| C           | 4.217836                | 0.000000  | -0.067729 |
| H           | 3.986864                | 0.894485  | -0.655524 |
| H           | 5.283946                | 0.000000  | 0.150559  |
| H           | 3.986853                | -0.894490 | -0.655513 |
| C           | -2.765360               | 0.001264  | 10.658186 |
| H           | -3.395852               | -0.893558 | 10.685279 |
| H           | -2.134300               | 0.002043  | 11.544757 |
| H           | -3.396832               | 0.895416  | 10.684435 |
| C           | -0.789653               | 0.000000  | -1.176655 |
| C           | -5.805939               | -0.000888 | 6.527904  |
| C           | -1.462811               | 0.000001  | -2.180648 |

|   |           |           |           |
|---|-----------|-----------|-----------|
| H | -2.051006 | 0.000001  | -3.075418 |
| C | -6.996307 | -0.001337 | 6.317738  |
| H | -8.052528 | -0.001732 | 6.141705  |
| N | -0.667105 | 0.000000  | 1.200684  |
| H | -1.680441 | 0.000000  | 1.187518  |
| N | 3.470935  | 0.000000  | 1.201594  |
| C | 4.222657  | 0.000000  | 2.465502  |
| H | 3.997468  | 0.895373  | 3.054791  |
| H | 3.997484  | -0.895382 | 3.054785  |
| H | 5.287802  | 0.000000  | 2.242206  |
| N | -1.906904 | 0.001152  | 9.461507  |
| C | -0.446925 | 0.001552  | 9.637420  |
| H | 0.001056  | -0.893788 | 9.193185  |
| H | 0.000609  | 0.896965  | 9.192880  |
| H | -0.220049 | 0.001785  | 10.701812 |
| N | -3.582373 | -0.000355 | 5.677856  |
| H | -4.004524 | -0.000719 | 4.756525  |

---
